# Supplementary material
Source: publisher site journal article supplement (https://www.dovepress.com/article/290079)

Appendix

Table A1: Participants Characteristics

| **Variable** | **N (%)** |
| --- | --- |
| **RTMM N (%)** | 75(52%) |
| **SMS N (%)** | 68 (48%) |
| **Sex (RTMM/SMS) N (%)**  Male  Female | 43(30%)  100(70%) |
| **Education level(RTMM/SMS) N (%)**  Non-at all  Primary(1 to 7 grade)  Secondary(8 -11 grade)  Tertiary(above 12 grade) | 2(1.4)  89(62.2)  49(34.3)  3(2.1) |
| **Marital status(RTMM/SMS) N (%)**  Single  Married  Living as married  Separated  Divorced  Widowed | 49(34)  59(41)  4(3)  12(8)  5(4)  14(10) |
| **Age Median (IRQ)** | 43(50-34) |

Table A2: Exit interview questions with narrative explanations from participants.

| **TFA Constructs** | **Feedbacks** | N(%) | Missing(N) |
| --- | --- | --- | --- |
| **Affective Attitude** | **General experience using RTMM device**  Not good at all  Good  Very good | 1(1)  43(58)  30(40) | 1 |
| **General experience with receiving SMS**  Not good at all  Not good  Good  Very good | 1 (1)  1 (1)  91 (64)  47 (33) | 3 |
| **SMS delivered on time**  Yes  No | 107(75)  32 (22) | 4 |
| **Display Medication intakes in graph**  Not good  Good  Very Good | 6(4)  93(65)  43(30) | 1 |
| **Happy with the intervention**  Yes  No | 140(98)  1(1) | 2 |
| **Opinion about SMS Reminder**  Not good at all  good  Very good | 1(1)  39(27)  28(20) | 0 |
| **Experienced any Network problems**  Yes  No | 51(36)  92(64) |  |
| Explanations of network problems   - There is network problem at my working place but not at home. - There was network problem in a place where I was staying before I shifted to new place. - There was a period I went to stay in village I got network problem for four months. |  |  |
| **Explanations of Did not like content (n=4)**   - The words 'you are reminded to take medication' was not good to me. - It breaks the confidentiality. - The word 'take medication' is not good. It breaches confidentiality. - The SMS which says 'medication' is not good if someone else sees it. |  |  |
| **Is it okay to receive SMS only three times per week?**  Yes  No | 34(50)  34(50) |  |
| **If no, why?**  Because other day I can forget to take my drug.  We are taking medication every day why don’t you remind every day? |  | 1 |
| **Perceived Effectiveness** | **Intervention improves adherence**  Yes | 142(99) | 1 |
| **Preferred to Receive more than one SMS per day**  Yes  No | 60(42)  80(56) | 3 |
| **Perceived Burden** | **Experience Problems with SMS**  Yes  No | 6 (4)  134(94) | 3 |
| **Explain the problems**   - There were days I forgot my phone, my friend saw SMS and started to ask me a lot of questions which I did not like. - There were some people who saw the SMS and started to ask me questions and to follow me. |  |  |
| **Experienced any stigma (not related with intervention)**  Yes  No | 33(23)  109(76) | 1 |
| **Difficult to use the Device**  Yes  No | 2(2)  72(96) | 1 |
| **Concern about Daily monitoring**  Yes  No | 6(8)  68(91) | 1 |
| **Challenge to Refill medication**  Yes  No | 1(2)  73(97) | 1 |
| **Worry to Lose device**  Yes  No | 7(9)  67(89) | 1 |
| **Appropriate receive SMS**  Yes  No | 130(91)  9(6) | 4 |
| **Difficulties with receiving SMS**  Yes  No | 9 (6)  131 (92) | 3 |
| **Explanations of bad experience (n=2)**   - The SMS as they come in, sometimes I’m not with my phone, so if someone else sees that you are reminded to take medications - this may lead to lack of confidentiality – disclosure. - I’m living in a rural area with a lot of problems with network, so sometimes SMS is delayed to come on time. Once I woke up and saw the SMS in the morning. |  |  |
| **Burden Keeping device at home**  Yes  No | 4(5)  70(93) | 1 |
| **Explain not good at all (n=1)(Opinion about content)**  I was uncomfortable when I got such SMS |  |  |
| **SMS delivered on time**  Yes  No | 107(75)  32 (22) |  |
| **Explanations of SMS not arriving on time**   - The SMS were late most of the times about 30 minutes later - Sometimes she finds the SMS in the morning - Sometimes the SMS is delayed up to one day |  |  |
| **Ethicality** | **Opinion about content**  Not good at all  Not good  Good  Very good | 4 (3)  7 (5)  78 (55)  50 (35) | 4 |
| **Appropriate receive SMS**  Yes  No | 130(91)  9(6) | 4 |
| **If not good at all/not good, content could be**  The word Medicine should be removed from the content and say that “don’t forgot to keep ball in the net”   - The content should be “Don’t forgot to use our product instead of medication” - The word Medicine should be removed and keep the word like BUNDLE - “Don’t forget to use your voucher” or remember your responsibilities” |  |  |
| **self-efficacy.** | **Non recorded in regarding to self-efficacy** |  |  |
| **Intervention coherence** | **Difficulty charging**  Yes  No | 9(12)  64(85) |  |
| **Able to reply SMS**  Yes  No | 62(91)  5(9) | 1 |
| Explanation for not being able to reply   - My phone was broken - My phone has gotten problem in written SMS - There was no network |  |  |
| **Take medication on the days not receiving SMS**  Yes  No | 67(99)  1(1) |  |
| **Difficult to Refill medication**  Yes  No | 1(2)  73(97) | 1 |
| **Understand Display Medication intakes in graph**  **Yes**  **No** | 6(4)  136(95) | 1 |
| **Opportunity Costs** | **Concern about Daily monitoring**  Yes  No | 6(8)  68(91) | 1 |
| N=1  I have problem especially inside of my house when someone calls me, I must go outside of my house |  |  |

Table A3: Demographic and adherence characteristics of participants of in-depth interview

| ID number | Arm | Sex | Age | Years since positive HIV test | Years on current ARV | Regimen | Adherence pill counts | Adherence SR week | Adherence SR month | Adherence SMS/RTMM | Problems | VL V7 |
| --- | --- | --- | --- | --- | --- | --- | --- | --- | --- | --- | --- | --- |
| 1 | SMS | F | 19 | Unknown | 10 | EFV+AZT+3TC | 62% | 74.3 | 75.4 | 53% | Answered 58% | 6679 |
| 2 | RTMM | M | 21 | Unknown | 13 | NVP+AZT+3TC | 99% | 95.2 | 98.9 | 97% | No SMS sent | <20 |
| 3 | RTMM | F | 53 | 15.1 | 3.3 | EFV+TNF+FTC | 99% | 97.6 | 99.5 | 97% | No problems | 30 |
| 4 | SMS | F | 50 | 12.8 | 6.8 | EFV+TNF+FTC | 98% | 100 | 100 | 100% | No problems | <20 |
| 5 | RTMM | F | 20 | 11.9 | 0.9 | ATV/r+AZT+3TC | 94% | 81 | 81.2 | 88% | No problems | <20 |
| 6 | SMS | M | 34 | 8.8 | 8.7 | EFV+AZT+3TC | 90% | 85.7 | 96.8 | 100% | Missed two visits | 33 |
| 7 | SMS | M | 48 | 23.4 | 6.2 | EFV+ABC+3TC | 84% | 100 | 100 | 66% | Answered 66% | 82 |
| 8 | RTMM | F | 49 | 11.1 | 10.2 | NVP+AZT+3TC | 92% | 95.2 | 97.6 | 98% | No problems | <20 |
| 9 | SMS | F | 47 | 12.3 | 11.1 | EFV+AZT+3TC | 95% | 100 | 100 | 100% | No problems | <20 |
| 10 | RTMM | M | 57 | 4.4 | 4.3 | EFV+TNF+3TC | 98% | 100 | 100 | 99% | No problems | <20 |
| 11 | SMS | F | 23 | 1.8 | 1.8 | EFV+TNF+3TC | 94% | 100 | 99.4 | 100% | No problems | <20 |
| 12 | RTMM | F | 45 | 13.2 | 5.7 | EFV+TNF+FTC | 96% | 83.3 | 83.3 | 74% | No problems | 142 |
| 13 | SMS | F | 40 | 11.5 | 3.6 | EFV+TNF+3TC | 95% | 100 | 100 | 100% | No problems | <20 |
| 14 | RTMM | M | 33 | 4.6 | 4.6 | EFV+AZT+3TC | 97% | 85.7 | 96.7 | 59% | No problems | 12447 |
| 15 | SMS | M | 38 | 7.8 | 7.5 | NVP+AZT+3TC | 82% | 100 | 100 | 100% | No problems | 8632 |
| 16 | SMS | F | 45 | 0.8 | 0.8 | EFV+TNF+3TC | 83% | 100 | 100 | 100% | No problems | 74449 |
| 17 | RTMM | F | 39 | 2.2 | 1.9 | EFV+TNF+3TC | 100% | 100 | 100 | 97% | No problems | <20 |
| 18 | SMS | F | 40 | 0.6 | 0.6 | EFV+TNF+3TC | 100% | 100 | 100 | 100% | No problems | 57 |
| 19 | RTMM | M | 54 | 7 | 6.6 | EFV+TNF+3TC | 100% | 97.6 | 99.4 | 69% | No problems | <20 |

| Table A4: Themes and Quotes | | |
| --- | --- | --- |
| **Themes** | **Subthemes** | **Illustrative Quotes** |
| Affective Attitude | - Happy with intervention - Experience with the device (size and appearance) - Satisfied with graph report - Disappointed to end the study - Wish to keep the device after end of study - Wish to continue to receive SMS after study - Experience with SMS content | - The effects of not taking medications as directed by the doctors are that, the viral loads will be high and the communicable diseases will follow you, you may die and leave your family in pain and even the nation will miss workforce. - They are supposed to be finished by the end of the month. To be seen that I followed well the dose taking I am supposed to finished by the end of the month. - For me to be enrolled in the project, it was something that made me feel very happy and I would say it was a good opportunity to me…especially when I was given the device which helped me to store my medications, which I could open at any place and take my medications without any stress; - What I would request is for the project to put…or continue with the system of reminding people, even after the project has ended, messages could remain on the phone so that people could still be reminded. - If you don’t take medications on time, this causes the virus to multiply, but if you take medications as directed, it makes the virus not able to multiply it means they become less in the blood. - I wished they [read SMS] were coming every day because they motivated me to remember taking medications. - Yes, I would sometime take the dose but most of time chances of skipping are there. - I found the device was very useful to me because I could be taking it anywhere I went. It was easy to store my medicines in there, more than keeping into a container whereby when you open it, you draw everybody’s attention. If I travel, I put it into my bag also. I used to store it in a can container, but if I travel that container makes noises, so different from device. I do refill my medicines in the device nobody knows what I am carrying. - I was keeping the device in my pocket, and sometimes I could hold it in my hands and nobody could ask me because it almost resembles my phone handset” - I found the device was very useful to me because I could be taking it anywhere I went. It was easy to store my medicines in there, more than keeping into a container whereby when you open it, you draw everybody’s attention. - If I travel, I put it into my bag also. I used to store it in a can container, but if I travel that container makes noises, so different from device. I do refill my medicines in the device nobody knows what I am carrying. |
| Perceived effectiveness | - Better treatment outcome - Change of behaviour - Achieved expectation - Effect on adherence | - I was given the device, it was very helpful which gave me a motivation to remember that I had not taken my medication. - Before, it was very difficult for me to take my medications in the place with many people, but with the device, I could just open it, take my medications without anybody noticing what I have just done. - In my side I see it for inspiring because I know vividly, my medicines are in the certain container and when it reaches the time I shall open it and take my medications. - The project helped me to remember the time for medication, as I was very careless in not in remember taking the medication. - But after the project, immediately go to take my medication. The messages rescued me as I have already opened a red card by nurses at the clinic, but after the project, Later I was removed from the red card and opened another file - Is my sister, I explained to her about the project, that I think I am very much happy with this research project as I think it helped me a lot. She asked me not to think of a bus fare I am getting from the project, I should think of my health, because she has realized my health has improved a lot since I was enrolled on the project. - The messages rescued me as I have already opened a red card by nurses at the clinic [meaning having bad treatment outcomes], but after the project, I was removed from the red card and opened another file. |
| Perceived Burden | - Too many SMS - Too long feedback session - Carrying device - Being daily monitored - Cost - Intervention Stigma | - I used to take a little rest before the time, if I would wake up before 10.00 when the message comes, and take my medications, only to find I have over slept!! That is how it came where the report shows that I skipped my medications. - if somebody saw the message it could cause some problem, but I could defend that I am using the medicine could be for TB or Blood Pressure, and if he even saw it, once he wouldn’t know it was a continuous message or know that it was coming from a certain institution using that kind of system. - The message had a problem where it was reading MEDICINE (DAWA) This word should be changed or look for another word to be used so that the message can be understood. This is because my phone gets handled with several people. - Yes, if the word medication could be removed it should be replaced with another way let’s say the message could be saying DO YOU REMEMBER? And I could reply saying 'yes' I remember. - I try to hide it, my mother forced me to give it [the phone] to her to read, saying she must see the message, I told her it is the message regarding the medications, then she was asking me what kind of medications. - if the word medicine could be removed it should be replaced with another word. Let’s say the message could be saying DO YOU REMEMBER? And I could reply saying ‘yes I remember’.”Its shape was good, but for a person who did not know what was it, it was easy for him to take it just to see what was that, or could be mistaken with the phone and somebody could disappear with it. - Nobody can ask me why are you taking medications, because in our country we have freedom on everything except where we are breaking the laws. The only difficult times come when taking the medications from the device, there will draw people’s attention. - Yes, it is big, and if I travelled, I used to put it into my bag because to put it in my pockets, its size is bigger than the touch phone. So, to carry this device in my pockets plus the phone, really looks a big load in my trouser pockets. That is why many times I carried it in my bag. - The interview with nurses at the clinic was too long until I get tired. May be the interview should be made shorter in future studies. Also, that nurse’s tablet was somehow giving trouble to operate. |
| HIV Stigma | - Sometime you find yourself in a family not all family members know you are sick - Another challenge is that when you are seen taking medicines very Often what will you say? - In my house no medicine containers, completely, you cannot come at any time and find them because I have friends, when they come they may go after my clothes or this or do and that: Some of friends may come for proof after hearing that certain person is sick, so they may just come for proof. Therefore, I am not giving people such chance. - Yes, I leave hem at the pharmacy, even the surplus, I put them in what they call the pain killer containers. Medicines are also kept in my shop. - No! I did miss clinic only for three reasons: First the people around me, secondly, I am just living here at the KCMC, the third, people are just sitting like you but there is legion - Mt. Meru Hospitals, people treat you nicely, just because they do not know you. So, when you come back to this place, you just come fresh, because nobody has evidence of what is going on with you. But here at the KCMC I do meet people - I felt uncomfortable and found myself leaving the place, very unhappy, why because you find somebody serving inside here, sick like me, yet he goes out and tell people, that girl!! There is nothing there, she is sick!!! - In the past we used to take our medications from the place the doctors have seen us. So, we would request that after seen the doctors, if we could get our medications at the upstairs. - Before device, what contributed most was that, when people realize your situation, they don’t want even to touch something that you are holding, they just form a stigma situation on you. - It happened that I went to visit him and he offered me a soft drink, after I finished I gave back the empty bottle to his child to put it back to the crate but to my surprise, he asked his child not to touch the bottle, he took it and dropped it into the pit latrine. Straight from there he stigmatized me. - I did not like Mawenzi, because, at Mawenzi if you go there late, you find a security guard at the gate, who takes your card he opens and read it, and then calls you harshly to go inside. Therefore, I went to ask the doctor to give me a permission to change to the KCMC - They did not see the SMS but were hearing the message delivery tone which came at 08.30 and 09.00 am and then asked me why so often messages every day on the same time. I told them they were the lottery messages, then they never asked me again. |
| Ethicality | - Fit with lifestyle (religion, belief, rights, culture) - Social Support | - Yes, device made them to believe that I was taking my medication - Obviously, my sister has never mentioned to me the word medicine in her life: You just hear the word (pipi) sweets that is it. So, when you hear Pipi you just remember yourself time to take medication - They all know about my situation and were very happy that I got that device to help me because they knew there was no more time for forgetting time for medication or dropping the tablets under my bed, that is what made them very happy about device. - I share my phone with my husband, so when the message comes in, he just tells me the KCMC doctors have asked you to take your medications - They all know about my situation and were very happy that I got that device to help me because they knew there was no more time for forgetting time for medication or dropping the tablets under my bed, that is what made them very happy about device. - For my daughter to be aware of my situation, receiving SMS was a great opportunity for me not feeling like a punishment of my misbehaving to have HIV. So, my daughter knows well that if I will leave the study I die. |
| Self-efficacy | Influenced behaviour changes | - Before the project I was drinking alcohol extensively. So, when I came home at night it was difficult for me to take medications at that time while my wife adhered to the medications. I had to pretend in front of her I took medication while I didn’t. Now since I know I’m being monitored, I have stopped drinking alcohol and decided to stick on my medications as usual. |
| Intervention Coherence | Understanding how to charge device charging  Understand how to refill the device  Understanding to reply the SMS  Understanding about the tablet use | - She was asking me the progress of my health and the medication. And she was opening her big telephone and read the progress of how I replied the messages. She showed me the messages that I did not reply and those I had replied - I think they were testing me, when there was no message that I should keep myself alert that this is the time for medication, even if there are no messages. - Yes, messages were just coming at random hours, I also have said this to sister. - “Did you take your medications on time” when it came, I knew it was the time for my medications. Sometimes it was writing “Do you take your medications as per the doctor’s description?” After that I knew it was almost my time for medication, so even how busy I was, I prepared myself for taking medication. - The nurse used to explain to me about the project, she was taking her tablet and read to me that you have been able to answer certain messages and you were not able to answer such and such messages. I realized that I was replying messages before I was even sent the message. - I told him that this is the thing which I was given to me as a test for me to take medications. If I miss a medication dose, I should be failing the text as well. Therefore, my child was very keen in reminding me to take my medications and knowing that if mother misses the done she has felt the test - She was asking me the progress of my health and the medication. And she was opening her big telephone and read the progress of how I replied the messages. She showed me the messages that I did not reply and those I had replied. - She was telling me that my report is good and that I should continue with that good report. She did not show me a graph. - I do fill 20 in the front and 20 at the back, meaning when I have taken almost all and one is remaining, the next day I open and refill it. I have never left it to be completely empty - I used to put my medications on its two sides and was able to hold me for several days. - I have been using device, and it has two parts: because I was given two types of medications, so I used device to store those two types into its two parts, one side used to store those strong medications and another side I used to store those to calm down. Each time I opened it I used to take medications from both sides. - Three times even up to four times. I was receiving messages telling me for example in the morning you are told, remember to take your medication. Please follow doctor’s instructions. At night you are also told!! remember to take your medication |
| Opportunity Cost | Incurred extra cost for the sake of the study | - The reason I moved from village to town was because my device was not communicating and the report was showing I was not opening the device while I did. - I stayed with device for six months before it was off the charge, and because at home we did not have electricity, I took it to the young man who was educated, I told him not to open it but just put it on the charge and he charged me 2000/- shilling. |

Figure A1: Seven constructs of TFA
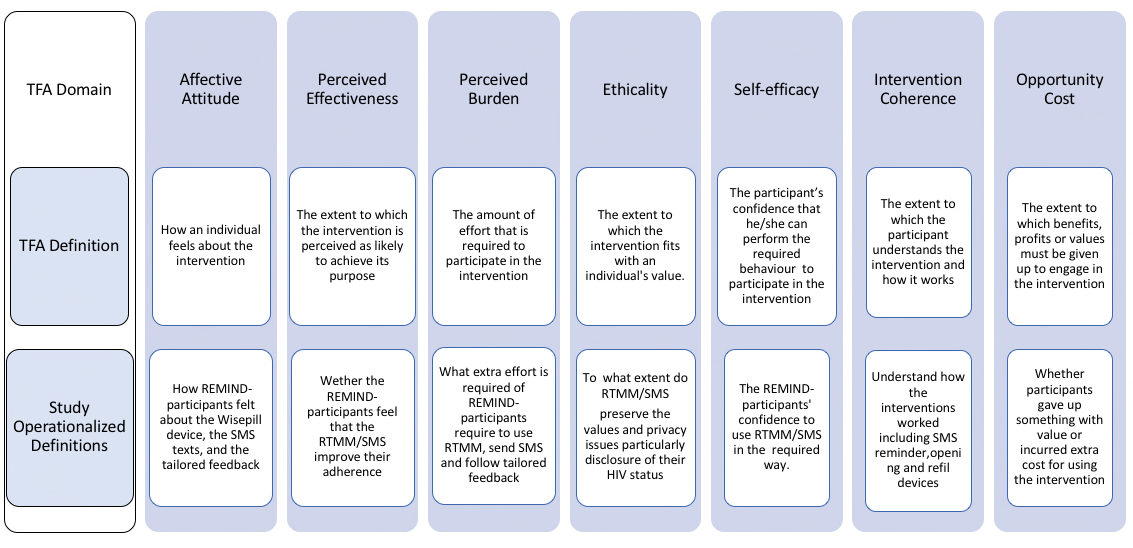

Supplement: Supplementary file 1 [file get_supplementary_file.php]
